# Supplementary material
Source: PubMed Central journal article supplement (PMC4144018)
Supplement: NIHMS601561-supplement-01.pdf [file NIHMS601561-supplement-01.pdf]

**Figure S1.**

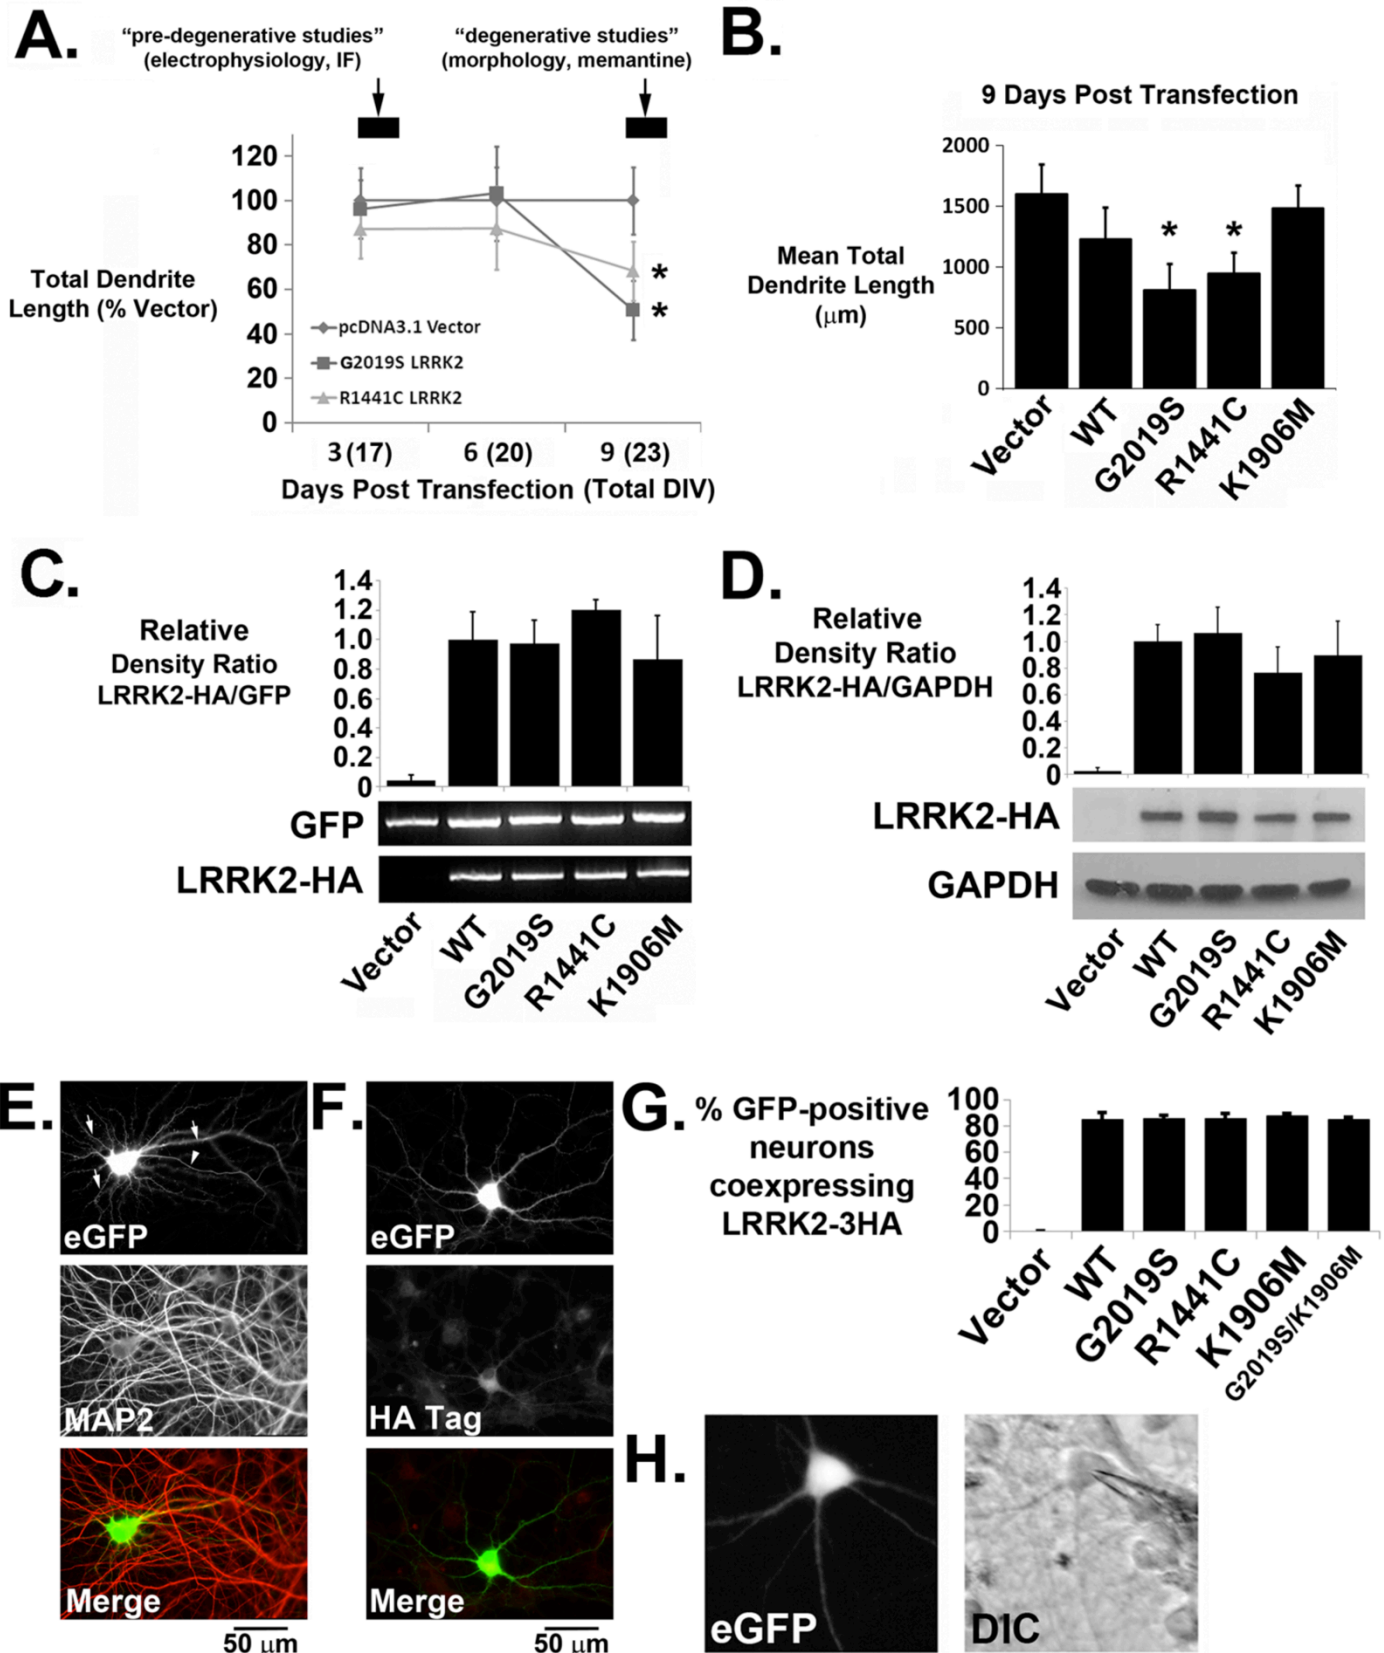

**Supplementary Figure S1.** (A) Early, “pre-degenerative” cortical neuron recordings and synapse protein immunofluorescence studies were conducted 3 days following transfection, whereas the dendrite “degenerative” effects of mutant LRRK2 were studied at 9 days post-transfection (\* $p < 0.05$  compared to vector transfected neurons). (B) Mean total neurite length at 9 days post transfection (23 DIV) was decreased in G2019S LRRK2 and R1441C LRRK2 expressing neurons, but not in K1906M LRRK2 expressing neurons. Wild type overexpressing LRRK2 neurons showed a modest trend towards neurite attenuation at 9 days post transfection. (C) RT-PCR analysis of GFP and LRRK2-3HA transcript levels from rat cortical cultures transfected with LRRK2-3HA cDNA constructs ( $n=4$  for each plasmid) showed no significant difference in WT LRRK2-HA expression relative to LRRK2 mutants (ANOVA: 3df, F-Ratio: 0.132). (D) Western blot analysis of HA Tag immunoreactivity in whole cell extracts from B103 neuroblastoma cultures transfected with LRRK2-3HA cDNA constructs ( $n=4$  for each plasmid) showed no significant difference in WT LRRK2-HA expression relative to the LRRK2 mutants (ANOVA: 3df, F-Ratio: 0.433). (E) GFP expressing transfected neurons demonstrated positive MAP2 immunoreactivity in dendrites (arrow). An arrowhead identifies the axon. (F) Anti-HA Tag immunocytochemistry demonstrated LRRK2 cDNA expression in GFP expressing neurons. (G) Approximately 85% of the GFP-positive neurons demonstrated HA Tag immunoreactivity for the LRRK2 expression constructs employed in these studies at 1 day post-transfection. (H) Transfected neurons were identified via GFP fluorescence and approached with pipette electrodes for patch clamp recordings.

## Figure S2

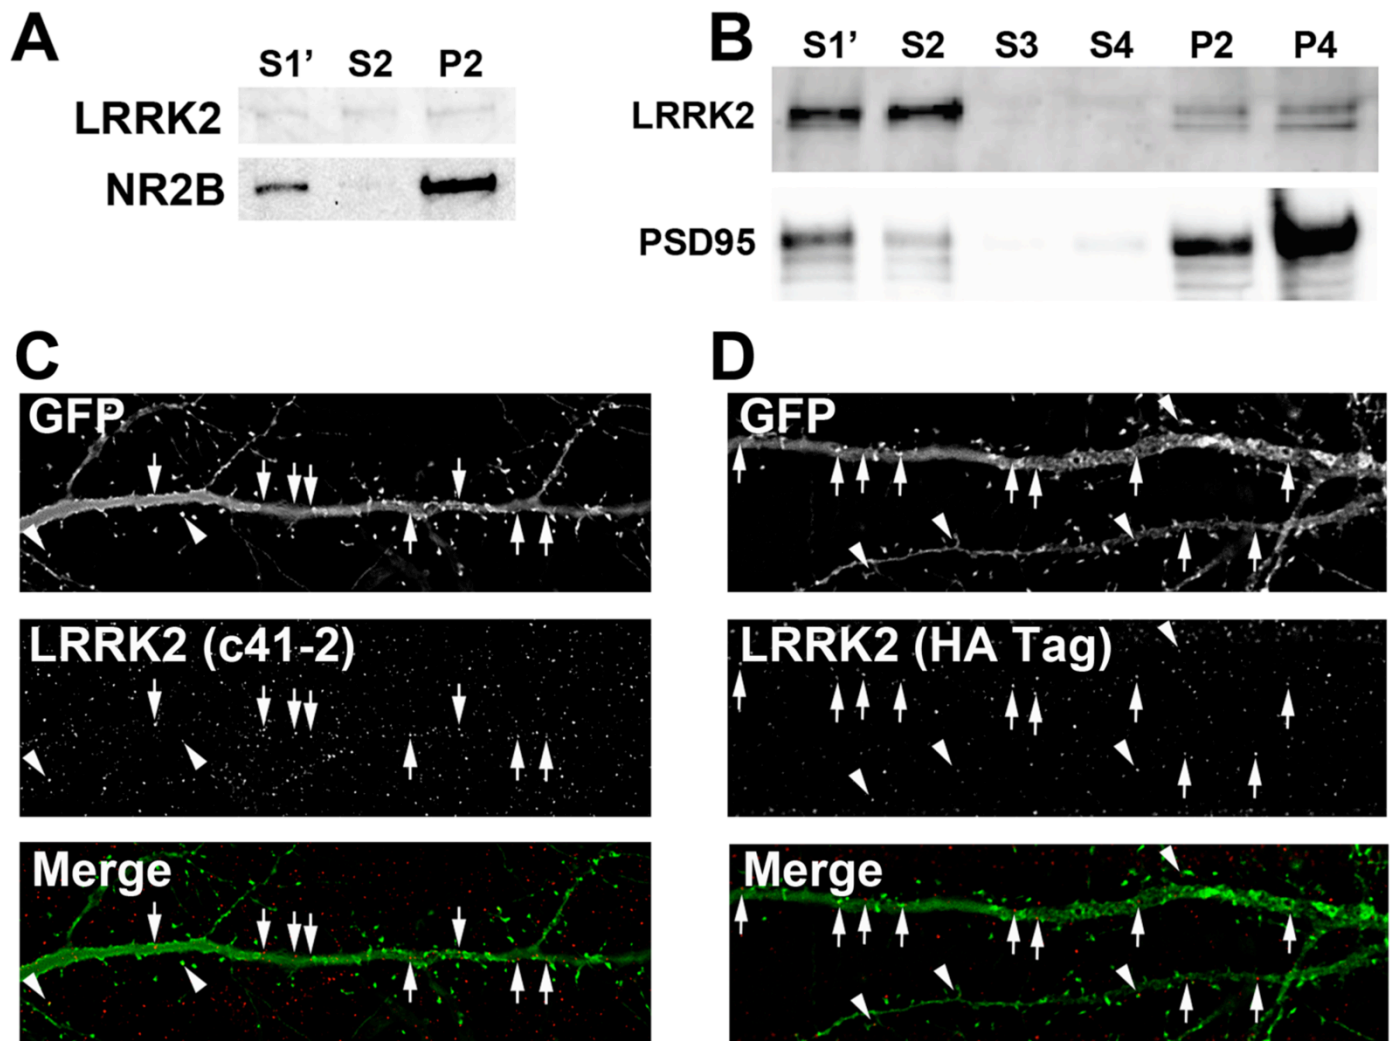

**Supplementary Figure S2.** (A) A crude synaptosomal preparation from cultured rat cortical neurons probed with a LRRK2 antibody (clone c41-2) demonstrated LRRK2 immunoreactivity, but no LRRK2 enrichment, in P2 fractions. (B) LRRK2 immunoreactivity was also detected, but not enriched, in P4 (PSD-1T) fractions of cultured cortical neurons. S1': whole cell lysate; S2: cytosolic fraction; S3: synaptic vesicle fraction; S4: synaptic membrane; P2: crude synaptosome fraction; P4: PSD-1T fraction. (C, D) Thin-stacked deconvolved images of endogenous rat LRRK2 (C) and ectopic human LRRK2-3HA in GFP expressing dendrites (D) demonstrate LRRK2 immunoreactivity predominantly in dendrites (arrows) and occasionally in dendritic spines (arrowheads).
